# Supplementary material for: Decreased Variability of the 6-Minute Walk Test by Heart Rate Correction in Patients with Neuromuscular Disease
Source: PLoS One. 2014 Dec 5;9(12):e114273. doi: 10.1371/journal.pone.0114273 (PMC4257612; doi:10.1371/journal.pone.0114273)
Supplement: File S2 — Continued measured heart rate data for patients. (XLSX) [file pone.0114273.s002.xlsx]

## Sheet: P1
TEST 1
Time	+0:00	+0:05	+0:10	+0:15	+0:20	+0:25	+0:30	+0:35	+0:40	+0:45	+0:50	+0:55
00:00:00	80	80	80	80	80	79	79	81	82	82	82	83
00:01:00	82	82	82	82	79	78	76	78	79	80	80	79
00:02:00	78	78	78	79	82	81	81	80	79	79	78	79
00:03:00	81	81	81	81	82	84	83	83	83	81	81	81
00:04:00	81	80	79	79	82	82	84	83	82	80	81	82
00:05:00	81	81	80	80	86	87	91	93	93	92	86	85
00:06:00
TEST 2
Time	+0:00	+0:01	+0:02	+0:03	+0:04	+0:05	+0:06	+0:07	+0:08	+0:09	+0:10	+0:11
00:00:00	70	70	70	70	69	69	69	69	68	69	72	74
00:00:12	82	85	89	90	92	94	95	96	96	97	97	97
00:00:24	97	97	98	98	98	99	99	99	99	99	98	98
00:00:36	99	99	100	101	101	103	103	104	104	105	105	105
00:00:48	105	105	104	104	103	103	102	102	102	102	102	102
00:01:00	103	103	104	105	105	106	106	106	106	106	107	107
00:01:12	108	109	110	110	111	111	112	112	112	112	111	110
00:01:24	109	109	109	109	110	111	111	111	111	111	112	111
00:01:36	111	111	111	111	110	110	110	110	111	111	111	111
00:01:48	111	110	110	110	110	110	111	111	111	112	112	112
00:02:00	111	111	112	112	112	112	113	113	113	113	113	113
00:02:12	113	113	112	110	109	108	108	108	109	109	110	110
00:02:24	110	111	112	113	113	114	114	114	114	114	114	114
00:02:36	114	114	114	114	114	113	112	112	112	112	113	113
00:02:48	114	114	114	114	114	114	115	115	115	116	116	116
00:03:00	116	117	117	117	117	117	117	116	115	113	113	113
00:03:12	113	113	113	113	114	114	114	115	116	116	116	117
00:03:24	117	116	116	116	116	116	116	115	115	113	112	111
00:03:36	111	112	113	113	114	114	114	115	115	116	117	117
00:03:48	117	117	117	117	118	118	118	118	118	118	117	116
00:04:00	115	113	113	112	112	113	114	114	114	114	114	115
00:04:12	116	116	117	117	117	117	117	119	119	119	119	119
00:04:24	119	119	117	116	115	114	115	116	116	117	118	118
00:04:36	119	119	119	120	120	120	120	121	121	121	121	121
00:04:48	121	121	121	120	118	117	115	114	113	114	115	116
00:05:00	117	118	119	119	120	120	120	120	120	119	118	118
00:05:12	118	119	119	120	120	119	119	117	117	116	116	117
00:05:24	117	118	118	118	119	119	119	119	120	120	121	121
00:05:36	122	122	123	123	123	124	124	123	123	121	120	118
00:05:48	118	118	119	119	120	120	121	122	122	123	123	124
Test 3
Time	+0:00	+0:01	+0:02	+0:03	+0:04	+0:05	+0:06	+0:07	+0:08	+0:09	+0:10	+0:11
00:00:00	74	74	74	73	75	79	82	87	89	92	95	96
00:00:12	97	98	99	100	100	101	101	102	102	102	103	104
00:00:24	105	105	105	105	105	105	106	106	106	107	108	108
00:00:36	109	109	109	109	110	110	110	110	110	110	111	111
00:00:48	111	111	110	110	109	109	109	110	110	111	111	112
00:01:00	112	112	113	113	113	113	113	113	113	113	114	114
00:01:12	114	115	115	114	114	113	111	109	108	108	108	109
00:01:24	110	111	112	112	113	113	114	114	115	115	116	116
00:01:36	117	117	118	117	118	117	116	115	115	114	114	114
00:01:48	114	115	116	116	117	117	118	118	118	118	118	119
00:02:00	119	119	119	120	120	120	120	119	118	117	115	114
00:02:12	114	114	114	114	115	115	116	116	116	117	117	118
00:02:24	118	118	118	119	119	120	120	120	120	119	118	117
00:02:36	116	116	116	116	117	118	118	119	119	119	120	120
00:02:48	120	120	120	120	120	120	119	119	119	118	118	117
00:03:00	116	116	115	116	116	116	117	116	116	116	117	117
00:03:12	118	118	118	118	118	118	119	119	119	120	120	120
00:03:24	120	120	119	118	117	117	118	118	118	118	119	119
00:03:36	120	121	121	121	122	122	122	122	122	123	123	123
00:03:48	123	122	122	120	119	118	118	117	118	118	119	120
00:04:00	120	121	121	121	121	120	120	119	120	120	121	122
00:04:12	122	123	123	123	122	122	121	120	119	119	119	119
00:04:24	120	120	121	121	122	122	122	123	123	124	124	124
00:04:36	124	124	124	124	124	123	123	122	120	120	119	118
00:04:48	118	119	119	119	120	120	120	120	120	121	121	121
00:05:00	122	123	123	123	123	123	123	123	123	122	121	120
00:05:12	120	119	119	119	119	120	121	121	122	123	124	124
00:05:24	125	126	126	126	125	125	125	124	124	123	123	122
00:05:36	121	119	118	118	118	119	119	120	120	121	121	122
00:05:48	122	123	123	123	124	124	124	125	125	126	127	127

## Sheet: P2
TEST 1
Time	+0:00	+0:05	+0:10	+0:15	+0:20	+0:25	+0:30	+0:35	+0:40	+0:45	+0:50	+0:55
00:00:00	55	55	55	58	62	67	70	72	74	76	77	78
00:01:00	79	79	79	80	78	78	77	77	78	80	80	80
00:02:00	80	78	79	80	81	80	78	78	78	79	78	77
00:03:00	76	75	76	76	77	79	79	78	77	77	78	78
00:04:00	77	78	78	78	78	78	78	79	79	78	76	77
00:05:00	76	77	77	78	78	79	78	78	79	80	82	81
TEST 2
Time	+0:00	+0:01	+0:02	+0:03	+0:04	+0:05	+0:06	+0:07	+0:08	+0:09	+0:10	+0:11
00:00:00	56	56	56	56	57	58	58	59	60	61	63	64
00:00:12	65	67	68	69	70	71	72	72	73	73	74	74
00:00:24	75	75	76	76	76	77	77	78	78	78	78	78
00:00:36	78	78	77	78	78	78	78	78	78	78	79	79
00:00:48	80	80	81	81	81	81	81	82	82	82	82	82
00:01:00	83	83	83	83	84	84	84	84	85	85	85	85
00:01:12	86	86	86	86	86	86	86	86	86	87	86	86
00:01:24	86	86	85	84	84	83	83	83	82	83	83	83
00:01:36	82	82	82	82	83	83	82	82	82	82	82	82
00:01:48	82	82	82	82	82	81	81	81	81	82	82	83
00:02:00	83	84	84	84	84	84	84	84	84	84	84	84
00:02:12	84	84	84	83	83	83	83	82	82	81	81	81
00:02:24	81	81	81	80	80	80	80	81	81	82	83	83
00:02:36	84	84	84	83	83	84	84	83	83	82	81	80
00:02:48	80	79	78	78	78	77	78	78	79	80	80	81
00:03:00	81	82	82	83	83	83	83	83	83	82	82	82
00:03:12	82	82	82	82	82	82	82	82	81	81	81	80
00:03:24	80	80	80	81	81	82	82	82	83	83	83	82
00:03:36	82	82	82	82	83	83	83	84	84	84	84	83
00:03:48	82	82	81	80	80	80	81	81	82	83	83	83
00:04:00	84	84	84	84	83	83	82	83	83	83	83	83
00:04:12	84	84	84	84	84	84	84	83	83	82	82	82
00:04:24	82	82	82	83	83	83	83	82	82	82	81	81
00:04:36	81	81	81	81	82	82	83	83	83	83	83	84
00:04:48	84	83	82	82	81	81	80	80	80	80	81	81
00:05:00	81	82	82	83	83	83	83	84	84	84	84	84
00:05:12	85	85	85	84	84	84	84	84	84	81	82	83
00:05:24	84	84	84	84	84	84	84	84	84	84	84	84
00:05:36	85	85	86	86	86	86	86	86	86	86	86	86
00:05:48	86	86	85	85	85	84	84	84	84	85	85	86
Test 3
Time	+0:00	+0:01	+0:02	+0:03	+0:04	+0:05	+0:06	+0:07	+0:08	+0:09	+0:10	+0:11
00:00:00	59	59	59	59	59	58	57	56	56	56	57	59
00:00:12	60	62	64	66	69	70	71	72	74	75	75	76
00:00:24	76	77	77	78	78	78	79	79	79	79	79	79
00:00:36	79	79	79	79	79	79	79	79	79	81	81	82
00:00:48	82	82	83	83	84	84	84	85	84	84	83	83
00:01:00	83	82	82	82	82	81	81	81	81	82	82	82
00:01:12	81	81	81	81	80	80	80	80	80	81	81	82
00:01:24	82	82	83	84	85	85	86	87	89	89	90	90
00:01:36	91	91	91	91	91	91	91	91	91	91	91	91
00:01:48	91	90	90	89	89	88	88	87	87	87	87	88
00:02:00	88	88	88	88	88	88	88	87	87	87	86	86
00:02:12	85	85	85	85	85	85	84	84	84	84	85	85
00:02:24	85	84	84	84	84	84	84	85	85	85	86	86
00:02:36	86	86	86	86	85	85	84	84	83	83	82	81
00:02:48	81	80	80	80	81	81	82	83	83	84	84	85
00:03:00	85	85	85	85	85	86	86	86	86	86	86	86
00:03:12	86	86	85	85	85	85	85	85	84	85	85	85
00:03:24	85	85	84	84	84	84	84	84	82	82	81	81
00:03:36	80	80	79	79	78	77	76	76	75	76	77	77
00:03:48	78	80	81	82	83	83	83	83	83	83	83	83
00:04:00	83	83	83	83	82	82	82	81	81	81	81	81
00:04:12	81	82	82	82	82	82	82	82	82	82	82	82
00:04:24	83	83	84	84	85	85	85	86	86	86	87	87
00:04:36	87	86	86	85	85	85	85	85	85	86	86	87
00:04:48	88	88	88	89	89	89	89	90	90	89	89	89
00:05:00	89	89	89	89	88	88	88	88	87	87	86	86
00:05:12	86	85	85	85	85	85	86	85	85	85	85	85
00:05:24	85	85	85	85	85	85	85	85	85	85	84	83
00:05:36	83	83	83	83	83	83	84	85	85	85	85	85
00:05:48	86	86	86	86	86	86	86	86	86	86	87	87

## Sheet: P3
TEST 1
Time	+0:00	+0:01	+0:02	+0:03	+0:04	+0:05	+0:06	+0:07	+0:08	+0:09	+0:10	+0:11
00:00:00	89	89	89	89	91	93	97	100	102	104	104	104
00:00:12	103	103	102	102	103	104	105	106	107	107	108	109
00:00:24	110	112	112	113	114	114	112	110	110	110	111	112
00:00:36	112	112	113	113	113	113	114	114	115	117	118	119
00:00:48	120	121	121	121	121	125	124	124	124	124	123	123
00:01:00	123	123	124	125	126	127	127	127	127	128	127	127
00:01:12	127	127	127	127	126	125	125	125	126	126	127	128
00:01:24	128	128	128	127	127	126	126	127	127	127	127	127
00:01:36	127	126	126	126	126	127	128	129	129	130	130	130
00:01:48	130	130	131	132	132	133	133	133	132	132	132	132
00:02:00	133	133	133	133	132	132	133	133	134	134	134	134
00:02:12	133	133	133	134	134	135	135	135	135	135	135	135
00:02:24	135	135	135	135	134	134	134	134	134	134	134	133
00:02:36	133	132	132	133	133	134	135	135	136	136	136	137
00:02:48	137	138	138	140	140	140	140	140	140	140	140	136
00:03:00	137	137	137	137	137	137	137	137	136	136	136	136
00:03:12	137	137	137	137	137	137	138	138	138	138	138	139
00:03:24	139	140	139	140	140	140	139	138	138	138	139	139
00:03:36	138	138	139	139	139	139	138	137	136	136	136	136
00:03:48	136	137	137	137	138	139	139	139	139	139	139	138
00:04:00	138	138	139	138	138	137	137	138	138	138	139	140
00:04:12	141	141	141	141	141	141	141	141	140	141	141	141
00:04:24	142	142	141	141	141	141	141	142	141	141	141	141
00:04:36	141	141	141	142	142	142	143	143	143	143	144	145
00:04:48	145	146	146	147	147	147	146	146	145	144	143	143
00:05:00	143	144	144	144	144	144	144	144	144	144	144	145
00:05:12	146	146	147	148	148	148	148	148	147	147	147	147
00:05:24	147	146	146	146	146	146	146	146	145	146	146	147
00:05:36	147	147	148	148	148	149	149	149	150	150	150	150
00:05:48	150	151	151	151	151	151	151	150	150	149	149	150
TEST2
Time	+0:00	+0:01	+0:02	+0:03	+0:04	+0:05	+0:06	+0:07	+0:08	+0:09	+0:10	+0:11
00:00:00	94	94	94	95	97	102	106	109	111	113	114	114
00:00:12	115	116	117	119	120	121	122	123	125	126	127	128
00:00:24	129	131	132	133	134	135	135	136	136	137	138	139
00:00:36	140	140	141	142	142	143	144	144	145	145	146	146
00:00:48	146	147	147	147	147	147	147	147	148	147	147	147
00:01:00	147	147	147	147	147	148	148	148	148	148	149	149
00:01:12	149	150	150	150	151	151	151	150	150	150	151	151
00:01:24	151	150	150	151	151	152	152	153	153	153	154	154
00:01:36	154	154	155	155	155	155	155	155	155	156	156	156
00:01:48	155	156	156	156	156	156	155	155	155	155	155	155
00:02:00	154	154	154	154	154	155	155	156	156	156	156	156
00:02:12	157	157	157	157	156	157	156	157	157	156	157	156
00:02:24	156	156	156	156	156	156	156	156	156	156	155	155
00:02:36	154	154	154	154	154	155	155	155	156	156	155	156
00:02:48	155	155	155	155	155	155	156	155	155	155	154	154
00:03:00	154	154	154	154	155	156	155	156	156	156	157	157
00:03:12	157	157	156	157	156	157	158	157	157	157	157	157
00:03:24	157	157	158	157	157	156	156	155	155	154	154	154
00:03:36	154	154	155	155	155	155	156	157	157	157	158	158
00:03:48	159	158	158	157	157	156	157	157	157	157	157	157
00:04:00	157	157	156	156	156	155	155	155	155	155	156	156
00:04:12	156	157	158	158	159	159	160	159	159	158	158	158
00:04:24	158	158	158	159	159	159	158	158	158	158	158	157
00:04:36	157	157	158	158	159	158	158	156	156	156	156	155
00:04:48	155	156	156	157	157	158	159	159	159	160	160	160
00:05:00	159	160	160	160	160	160	160	161	160	159	159	159
00:05:12	159	158	158	159	160	159	159	159	158	159	159	159
00:05:24	159	159	159	159	159	159	160	160	160	160	160	161
00:05:36	160	160	160	160	160	160	160	160	160	161	161	162
00:05:48	161	161	160	161	161	160	161	161	160	161	161	161
TEST 3
Time	+0:00	+0:01	+0:02	+0:03	+0:04	+0:05	+0:06	+0:07	+0:08	+0:09	+0:10	+0:11
00:00:00	86	86	87	93	93	97	101	104	106	107	110	111
00:00:12	113	114	115	117	118	119	119	121	120	120	120	118
00:00:24	117	118	119	120	121	123	124	125	126	127	128	128
00:00:36	129	130	130	131	131	132	132	133	134	134	134	135
00:00:48	135	135	135	135	135	135	135	136	136	137	137	136
00:01:00	136	136	136	136	136	136	135	136	136	137	137	138
00:01:12	139	140	141	141	143	144	144	145	146	147	147	147
00:01:24	148	148	148	148	149	149	149	149	149	149	150	150
00:01:36	150	150	150	150	150	150	150	150	150	149	149	150
00:01:48	149	150	150	151	151	151	151	151	151	152	152	152
00:02:00	152	152	152	151	151	152	152	152	152	151	151	150
00:02:12	150	150	150	151	151	152	152	152	151	151	151	151
00:02:24	151	151	150	150	150	151	151	151	152	152	152	151
00:02:36	151	152	152	152	152	152	153	154	154	155	155	155
00:02:48	155	155	155	155	155	154	155	154	155	155	154	154
00:03:00	154	154	154	154	154	154	155	154	154	154	154	154
00:03:12	154	154	155	155	156	156	156	156	157	156	157	157
00:03:24	157	157	156	157	156	155	155	154	153	153	153	153
00:03:36	154	155	155	156	157	158	160	160	160	160	160	160
00:03:48	161	160	161	161	161	160	161	160	161	161	160	159
00:04:00	160	160	160	159	159	159	159	159	158	158	158	158
00:04:12	159	159	160	160	161	160	160	160	160	160	161	161
00:04:24	162	162	163	162	163	163	163	164	163	164	164	164
00:04:36	164	165	165	165	164	165	164	165	165	165	164	165
00:04:48	164	165	164	165	165	165	165	165	165	164	164	165
00:05:00	166	165	166	165	164	164	163	164	163	164	164	164
00:05:12	164	164	164	166	165	165	166	166	166	166	165	166
00:05:24	165	165	166	166	165	165	166	165	165	165	164	164
00:05:36	164	164	165	165	165	165	166	165	166	166	164	164
00:05:48	165	163	164	163	164	164	164	164	164	165	166	167

## Sheet: P4
TEST 1
Time	+0:00	+0:01	+0:02	+0:03	+0:04	+0:05	+0:06	+0:07	+0:08	+0:09	+0:10	+0:11
00:00:00	100	100	99	98	98	98	98	99	101	102	103	103
00:00:12	103	103	105	105	105	105	105	105	106	111	107	107
00:00:24	108	108	109	109	110	109	109	109	108	108	108	108
00:00:36	109	110	110	111	111	112	112	112	113	113	114	115
00:00:48	115	115	115	115	114	114	114	114	114	114	114	114
00:01:00	114	114	115	115	115	116	116	116	116	116	117	117
00:01:12	117	117	117	117	117	118	118	117	118	118	119	119
00:01:24	119	119	119	119	119	120	120	120	120	121	120	120
00:01:36	120	121	121	121	122	122	122	122	123	123	123	123
00:01:48	124	124	123	123	123	123	124	124	124	124	124	123
00:02:00	123	123	123	123	123	123	123	122	122	122	122	122
00:02:12	122	122	122	122	122	122	122	122	122	122	122	122
00:02:24	122	122	122	123	123	123	123	123	122	123	123	123
00:02:36	123	122	122	122	122	122	122	122	122	122	124	124
00:02:48	124	124	124	123	123	123	124	124	123	123	123	123
00:03:00	123	123	123	123	122	122	122	121	121	120	120	120
00:03:12	119	120	119	120	120	120	120	120	120	120	120	120
00:03:24	120	119	119	119	119	119	119	119	119	119	120	120
00:03:36	120	120	120	120	120	120	120	120	120	120	120	120
00:03:48	121	120	120	120	121	121	121	122	122	122	122	121
00:04:00	122	122	122	122	122	121	121	121	121	120	120	121
00:04:12	120	121	121	121	121	122	122	122	122	121	121	121
00:04:24	120	120	119	119	120	120	120	120	121	121	121	121
00:04:36	121	121	121	121	122	121	122	121	122	121	121	121
00:04:48	122	121	121	122	121	122	122	122	121	121	121	121
00:05:00	121	120	120	120	120	119	120	120	120	120	120	119
00:05:12	118	118	118	118	118	118	118	118	119	119	119	119
00:05:24	120	120	121	121	120	120	120	120	120	119	119	118
00:05:36	119	120	120	120	120	120	121	121	121	121	121	120
00:05:48	119	119	118	118	118	118	119	119	119	119	119	119
TEST 2
Time	+0:00	+0:01	+0:02	+0:03	+0:04	+0:05	+0:06	+0:07	+0:08	+0:09	+0:10	+0:11
00:00:00	114	114	114	114	114	114	114	112	114	115	116	116
00:00:12	116	115	114	114	113	113	113	113	113	114	114	114
00:00:24	114	114	114	114	114	114	114	114	114	114	114	114
00:00:36	114	115	115	115	115	115	116	116	116	116	117	116
00:00:48	117	117	118	118	119	119	119	119	119	119	120	121
00:01:00	120	120	120	121	121	121	121	121	122	122	123	123
00:01:12	124	124	124	125	125	125	125	126	126	126	126	126
00:01:24	126	126	127	127	127	127	128	127	128	128	128	128
00:01:36	127	127	128	127	128	128	128	129	129	129	129	129
00:01:48	129	129	129	129	129	129	129	129	129	128	129	128
00:02:00	128	128	127	128	128	128	127	127	127	127	127	127
00:02:12	128	127	127	127	127	127	128	128	127	128	128	128
00:02:24	128	129	128	129	129	129	129	129	129	126	128	128
00:02:36	130	129	130	130	130	130	130	131	130	131	130	131
00:02:48	130	131	133	131	131	131	131	131	131	131	132	132
00:03:00	131	132	132	132	131	132	131	131	131	131	131	131
00:03:12	131	131	130	130	130	130	130	130	129	129	129	130
00:03:24	130	130	131	131	131	131	131	131	131	131	131	131
00:03:36	131	131	130	131	130	131	131	131	131	131	131	131
00:03:48	131	131	131	130	130	129	129	130	130	129	130	130
00:04:00	130	131	130	131	131	130	130	130	130	130	130	130
00:04:12	130	129	130	129	130	130	130	130	130	130	130	130
00:04:24	130	129	129	129	129	128	128	128	128	127	127	127
00:04:36	127	126	126	125	125	126	125	125	125	125	125	126
00:04:48	126	126	126	127	127	127	127	127	127	127	127	128
00:05:00	127	128	127	128	128	128	128	129	128	128	128	128
00:05:12	128	128	127	127	127	127	127	128	128	128	128	128
00:05:24	127	127	127	127	127	127	127	128	127	128	127	128
00:05:36	127	127	127	127	127	127	127	127	127	127	127	127
00:05:48	128	128	127	128	128	128	128	127	128	128	128	129
TEST 3
Time	+0:00	+0:01	+0:02	+0:03	+0:04	+0:05	+0:06	+0:07	+0:08	+0:09	+0:10	+0:11
00:00:00	84	84	84	84	84	84	84	84	87	87	88	90
00:00:12	91	91	92	93	94	93	93	94	94	95	95	95
00:00:24	95	95	95	96	96	97	97	97	97	97	97	98
00:00:36	97	98	98	98	99	99	99	100	100	101	102	103
00:00:48	103	103	104	104	104	104	105	105	106	106	106	107
00:01:00	107	108	108	108	108	108	108	109	108	109	109	109
00:01:12	109	109	109	109	109	109	109	109	109	109	109	110
00:01:24	110	111	111	111	111	111	111	111	111	112	112	112
00:01:36	112	112	112	112	112	113	113	113	114	114	114	114
00:01:48	114	114	115	115	116	116	116	116	120	116	116	116
00:02:00	117	117	117	117	117	117	117	117	117	116	116	116
00:02:12	116	116	116	116	118	117	117	117	116	116	116	116
00:02:24	116	116	116	116	116	116	117	116	117	116	116	116
00:02:36	117	117	117	117	116	116	117	117	117	117	117	117
00:02:48	118	117	118	117	117	117	118	118	118	118	118	118
00:03:00	118	119	118	119	118	118	118	119	119	118	118	118
00:03:12	118	118	118	118	118	118	118	118	118	118	118	118
00:03:24	118	118	118	118	118	118	118	118	121	120	119	118
00:03:36	118	119	119	119	119	122	119	119	122	119	119	119
00:03:48	119	119	118	118	118	118	118	118	119	119	119	119
00:04:00	119	119	119	119	119	120	119	119	119	119	119	119
00:04:12	118	119	118	118	118	118	120	119	118	118	118	118
00:04:24	118	118	118	118	118	118	118	118	117	117	117	117
00:04:36	117	117	118	117	117	118	118	117	117	118	118	118
00:04:48	119	119	118	118	118	118	118	118	118	118	117	118
00:05:00	118	118	118	118	117	117	117	117	117	116	116	116
00:05:12	116	115	115	115	115	115	115	115	115	115	115	115
00:05:24	115	115	115	116	116	116	116	116	116	116	116	116
00:05:36	116	117	117	117	117	117	116	117	116	116	116	116
00:05:48	116	116	117	117	117	117	117	118	118	118	118	118

## Sheet: P5
TEST 1
Time	+0:00	+0:01	+0:02	+0:03	+0:04	+0:05	+0:06	+0:07	+0:08	+0:09	+0:10	+0:11
00:00:00	95	95	95	98	99	104	108	110	109	109	108	108
00:00:12	107	107	106	105	105	106	107	108	110	111	112	113
00:00:24	113	114	115	115	115	115	114	113	113	113	114	114
00:00:36	114	113	112	112	111	110	110	109	108	108	107	108
00:00:48	109	110	111	111	111	111	110	110	110	110	110	111
00:01:00	111	112	114	113	114	114	114	115	115	114	114	114
00:01:12	115	115	115	114	114	114	113	113	113	112	113	113
00:01:24	114	114	114	115	115	116	116	116	117	118	118	119
00:01:36	119	118	118	118	117	117	116	116	117	118	117	117
00:01:48	118	117	116	117	116	116	116	117	117	116	116	115
00:02:00	115	116	116	117	117	116	117	117	118	118	118	118
00:02:12	117	118	118	117	118	118	118	118	117	118	118	117
00:02:24	117	117	117	116	116	115	115	114	113	114	114	114
00:02:36	114	114	114	115	115	115	115	115	115	115	115	112
00:02:48	112	111	110	110	109	112	114	115	116	117	118	120
00:03:00	121	121	121	121	121	121	121	121	121	121	120	120
00:03:12	120	119	119	120	121	121	121	121	121	120	120	120
00:03:24	120	119	119	117	117	117	116	116	116	116	116	115
00:03:36	115	115	115	115	116	117	117	118	118	117	117	116
00:03:48	116	116	116	117	116	117	117	117	117	117	117	116
00:04:00	116	117	116	116	116	117	117	117	116	115	115	116
00:04:12	116	117	117	117	117	117	118	118	119	119	119	118
00:04:24	118	119	120	119	118	118	118	119	119	119	118	118
00:04:36	116	116	114	114	115	116	116	116	116	116	116	116
00:04:48	116	116	114	114	114	115	115	116	116	116	116	117
00:05:00	114	115	116	117	117	118	118	117	118	117	118	118
00:05:12	119	119	119	118	118	117	116	114	115	115	116	116
00:05:24	117	117	117	118	118	118	118	117	117	117	117	117
00:05:36	117	117	117	117	117	116	115	116	116	116	117	117
00:05:48	117	118	118	119	119	119	120	120	120	120	120	120
TEST 2
Time	+0:00	+0:01	+0:02	+0:03	+0:04	+0:05	+0:06	+0:07	+0:08	+0:09	+0:10	+0:11
00:00:00	87	87	87	87	87	87	92	98	100	98	96	96
00:00:12	95	95	94	94	93	93	94	95	95	96	98	99
00:00:24	100	101	101	101	102	102	102	102	102	101	101	101
00:00:36	100	99	99	99	99	99	99	98	98	99	99	99
00:00:48	99	99	99	99	103	104	104	104	104	103	103	104
00:01:00	104	104	104	104	105	106	106	106	107	107	107	108
00:01:12	108	108	108	107	107	106	106	106	104	105	106	106
00:01:24	106	108	108	108	107	108	107	107	106	106	106	105
00:01:36	105	105	106	107	107	107	107	107	107	108	108	108
00:01:48	108	109	110	110	110	110	109	109	109	109	109	108
00:02:00	108	107	107	107	106	107	107	108	108	109	109	109
00:02:12	109	109	109	109	108	108	108	108	108	107	107	105
00:02:24	106	105	106	107	108	108	108	108	108	108	108	108
00:02:36	108	108	108	109	108	108	108	109	109	109	109	109
00:02:48	110	110	109	110	109	109	108	108	107	108	109	109
00:03:00	110	109	109	109	110	110	110	111	111	111	110	111
00:03:12	110	110	110	110	111	109	109	109	108	107	106	107
00:03:24	108	109	109	110	110	110	110	110	111	111	111	111
00:03:36	111	111	110	111	110	110	110	110	111	110	111	111
00:03:48	112	112	112	112	112	111	111	111	111	110	111	110
00:04:00	110	109	108	108	109	109	109	109	109	107	108	108
00:04:12	106	106	105	106	106	106	107	106	107	105	106	106
00:04:24	107	108	109	109	109	109	109	109	109	108	108	108
00:04:36	108	108	109	109	109	109	108	109	109	108	108	107
00:04:48	107	108	108	109	109	108	109	109	109	109	109	108
00:05:00	108	108	107	108	109	109	109	110	109	110	108	108
00:05:12	108	108	109	109	110	110	111	111	111	111	110	110
00:05:24	109	110	110	110	111	112	112	112	113	114	114	113
00:05:36	114	113	113	113	112	111	110	110	109	109	109	108
00:05:48	109	108	108	108	109	107	107	108	108	108	108	108
Test 3
Time	+0:00	+0:01	+0:02	+0:03	+0:04	+0:05	+0:06	+0:07	+0:08	+0:09	+0:10	+0:11
00:00:00	92	92	92	90	91	91	91	91	100	100	100	100
00:00:12	96	96	96	96	96	96	99	98	98	98	99	99
00:00:24	100	100	100	100	103	104	105	105	105	106	106	107
00:00:36	107	106	106	106	105	104	103	103	102	101	99	98
00:00:48	101	105	107	110	112	113	114	115	115	115	116	116
00:01:00	117	117	117	118	118	118	118	118	118	118	117	116
00:01:12	116	115	115	114	114	113	113	113	113	113	111	109
00:01:24	109	109	109	108	108	108	108	108	107	108	107	108
00:01:36	109	109	108	108	108	109	108	108	106	106	107	108
00:01:48	108	108	108	108	108	108	108	109	110	111	111	111
00:02:00	111	112	113	113	113	113	113	113	113	113	113	113
00:02:12	114	114	115	114	114	115	115	115	115	116	116	116
00:02:24	116	117	117	117	117	118	119	119	120	120	120	120
00:02:36	120	120	120	120	120	120	120	120	120	120	120	120
00:02:48	120	121	121	121	117	118	118	118	119	119	120	119
00:03:00	119	119	116	117	117	117	118	118	118	119	118	118
00:03:12	118	120	119	118	119	118	118	118	118	111	111	111
00:03:24	112	114	115	117	117	117	117	117	117	117	117	117
00:03:36	117	117	117	118	118	118	118	118	120	120	119	119
00:03:48	119	119	119	118	118	118	117	118	118	119	118	118
00:04:00	122	118	119	119	119	118	118	119	119	118	119	119
00:04:12	119	119	120	120	120	120	120	118	118	118	118	118
00:04:24	118	118	119	118	118	118	118	118	118	119	119	119
00:04:36	119	119	119	119	116	117	117	117	117	117	117	117
00:04:48	119	119	119	117	117	118	119	119	119	119	121	121
00:05:00	121	121	121	120	120	121	121	120	120	120	120	120
00:05:12	122	119	119	119	119	119	119	119	118	120	120	121
00:05:24	122	122	122	122	122	122	122	122	122	122	122	122
00:05:36	123	123	124	124	124	125	125	125	125	125	125	125
00:05:48	125	125	125	125	125	124	124	123	123	123	123	123

## Sheet: P6
Test 1
Tid	+0:00	+0:01	+0:02	+0:03	+0:04	+0:05	+0:06	+0:07	+0:08	+0:09	+0:10	+0:11
00:00:00	67	67	67	67	70	72	76	78	81	82	84	85
00:00:12	85	85	85	86	85	85	85	86	86	86	87	87
00:00:24	88	88	88	88	88	88	88	89	89	89	89	89
00:00:36	89	87	87	88	88	88	89	89	89	89	89	89
00:00:48	89	89	89	90	90	90	91	91	91	91	91	91
00:01:00	91	90	90	90	88	88	87	87	88	88	89	89
00:01:12	90	90	91	92	92	93	93	94	94	93	94	93
00:01:24	93	93	93	92	92	91	91	91	91	91	90	90
00:01:36	90	90	91	91	91	92	93	93	94	95	95	96
00:01:48	95	95	94	94	94	94	94	95	95	95	95	95
00:02:00	96	95	95	95	95	95	94	93	92	91	90	90
00:02:12	90	90	91	92	93	93	93	93	93	94	95	96
00:02:24	96	96	97	97	96	96	96	95	95	96	96	96
00:02:36	96	96	95	95	95	95	95	95	95	95	95	94
00:02:48	94	94	93	94	94	94	94	94	94	95	95	95
00:03:00	95	95	95	95	95	95	94	94	93	92	92	92
00:03:12	92	93	93	93	92	91	90	89	89	89	89	90
00:03:24	90	91	92	92	92	92	92	92	92	91	91	90
00:03:36	90	90	90	90	90	90	90	91	91	90	91	91
00:03:48	92	93	94	94	93	93	93	93	93	93	93	93
00:04:00	93	93	93	92	92	92	92	92	92	92	92	93
00:04:12	93	93	93	93	93	93	93	93	93	93	93	93
00:04:24	94	93	93	92	92	91	91	91	92	92	92	92
00:04:36	92	93	93	93	93	93	92	92	93	94	93	94
00:04:48	93	93	92	92	92	93	93	94	94	94	93	93
00:05:00	93	93	94	96	97	98	97	97	96	97	96	96
00:05:12	96	95	95	94	94	94	94	94	94	92	92	91
00:05:24	91	91	91	91	91	92	92	92	92	92	93	93
00:05:36	93	93	93	94	94	94	94	94	94	93	93	93
00:05:48	93	94	94	94	93	93	92	92	92	92	92	92
Test 2
Tid	+0:00	+0:01	+0:02	+0:03	+0:04	+0:05	+0:06	+0:07	+0:08	+0:09	+0:10	+0:11
00:00:00	73	73	73	73	72	72	74	76	78	81	81	81
00:00:12	80	80	80	80	81	81	81	81	81	83	83	85
00:00:24	85	86	87	87	87	88	88	88	89	89	89	88
00:00:36	88	88	89	89	89	89	90	90	90	91	91	91
00:00:48	91	91	91	91	91	92	92	92	91	91	91	91
00:01:00	91	90	90	90	90	89	88	88	88	89	90	90
00:01:12	90	90	90	91	91	91	91	92	91	91	91	91
00:01:24	91	92	93	93	94	95	95	96	96	96	96	96
00:01:36	96	96	94	94	94	94	94	94	94	94	94	94
00:01:48	94	95	95	95	94	94	94	94	95	95	95	95
00:02:00	96	96	96	96	96	95	94	94	93	93	93	93
00:02:12	93	93	93	93	93	94	95	95	96	96	96	96
00:02:24	96	96	96	96	96	96	95	96	96	97	97	97
00:02:36	96	95	95	94	94	94	94	94	95	96	96	97
00:02:48	98	98	98	98	98	97	97	97	97	96	96	96
00:03:00	96	97	97	98	98	98	98	99	97	96	94	94
00:03:12	93	93	93	92	92	93	93	94	95	96	97	97
00:03:24	97	98	98	97	96	95	95	95	95	96	96	96
00:03:36	96	95	95	93	93	93	93	94	95	96	97	97
00:03:48	97	98	97	98	98	98	98	98	98	98	97	97
00:04:00	97	96	97	97	97	97	97	98	97	97	97	97
00:04:12	97	97	97	97	97	96	94	94	93	93	94	94
00:04:24	95	97	97	97	97	97	97	97	97	97	96	96
00:04:36	96	96	96	96	94	94	93	92	92	92	93	93
00:04:48	95	95	96	96	97	97	97	97	97	97	97	97
00:05:00	97	97	97	97	97	98	98	98	97	98	97	96
00:05:12	95	94	93	93	93	94	94	94	94	94	94	94
00:05:24	95	95	96	96	97	97	97	96	96	96	96	96
00:05:36	96	96	97	97	97	96	95	95	94	95	95	95
00:05:48	95	95	96	97	97	97	97	97	100	100	100	101
Test 3
Time	+0:00	+0:01	+0:02	+0:03	+0:04	+0:05	+0:06	+0:07	+0:08	+0:09	+0:10	+0:11
00:00:00	74	74	73	72	74	74	74	74	83	85	87	87
00:00:12	86	85	85	84	83	82	82	83	83	85	86	87
00:00:24	88	88	89	89	89	89	89	89	89	88	88	87
00:00:36	88	88	89	90	90	91	92	91	91	90	90	90
00:00:48	91	91	91	91	91	91	91	90	90	90	90	90
00:01:00	90	89	89	88	88	88	88	89	89	89	89	88
00:01:12	89	89	90	91	92	93	93	93	93	94	94	94
00:01:24	95	94	95	95	95	95	95	94	93	92	92	92
00:01:36	92	93	94	94	93	93	93	93	93	93	94	94
00:01:48	94	95	95	95	95	93	93	93	93	93	92	92
00:02:00	92	91	91	91	91	91	90	90	90	90	90	90
00:02:12	90	90	91	91	92	93	93	93	92	92	91	90
00:02:24	89	89	89	89	90	91	92	92	91	91	91	91
00:02:36	91	92	92	92	92	92	92	92	92	92	92	92
00:02:48	92	92	92	93	93	93	93	93	93	93	93	93
00:03:00	92	91	91	91	91	91	91	90	91	92	92	93
00:03:12	93	93	93	94	95	95	94	93	94	94	96	96
00:03:24	96	96	97	97	96	95	95	95	95	96	96	96
00:03:36	96	95	95	95	94	95	95	95	95	95	95	95
00:03:48	94	95	95	94	94	94	94	94	93	93	93	93
00:04:00	92	92	92	92	92	92	92	92	92	91	91	90
00:04:12	91	92	92	93	93	93	93	91	90	90	91	92
00:04:24	92	93	93	92	91	91	91	91	92	92	92	93
00:04:36	93	94	94	94	95	94	93	93	93	94	94	94
00:04:48	95	94	93	92	92	92	93	93	93	92	92	91
00:05:00	91	90	91	92	92	93	93	93	92	91	90	89
00:05:12	89	89	89	90	90	92	92	93	93	93	92	92
00:05:24	91	91	91	91	90	91	90	90	90	91	92	93
00:05:36	94	95	95	95	95	95	95	94	95	96	97	97
00:05:48	97	97	98	98	98	98	97	97	97	96	96	96

## Sheet: P7
TEST 1
Tid	+0:00	+0:01	+0:02	+0:03	+0:04	+0:05	+0:06	+0:07	+0:08	+0:09	+0:10	+0:11
00:00:00	87	87	87	87	87	89	91	93	94	94	94	94
00:00:12	94	95	96	96	97	98	98	98	98	98	99	100
00:00:24	101	102	103	103	102	102	104	105	106	106	105	104
00:00:36	102	100	98	96	96	97	98	99	101	102	103	103
00:00:48	103	100	99	98	98	99	100	102	104	104	103	102
00:01:00	101	99	98	98	97	97	97	97	97	98	98	98
00:01:12	98	101	102	104	104	104	104	104	103	102	100	99
00:01:24	99	98	99	99	100	100	101	102	103	103	103	103
00:01:36	104	104	102	100	100	100	102	106	106	104	102	98
00:01:48	97	97	97	98	99	101	101	100	100	99	99	100
00:02:00	100	100	101	101	102	101	100	100	101	102	102	101
00:02:12	101	103	104	103	102	102	101	101	103	104	106	106
00:02:24	106	106	105	104	102	101	101	102	103	106	106	104
00:02:36	103	99	97	97	99	100	102	103	103	104	105	103
00:02:48	101	98	97	96	95	95	96	96	98	97	97	96
00:03:00	97	96	97	97	95	95	94	94	95	96	96	96
00:03:12	96	96	96	95	94	94	95	96	97	97	98	97
00:03:24	98	98	97	98	98	99	100	100	99	99	98	97
00:03:36	96	96	97	97	98	100	100	99	99	98	98	99
00:03:48	98	98	99	101	103	103	102	100	99	98	98	98
00:04:00	98	99	99	99	99	99	97	97	97	98	98	99
00:04:12	100	101	101	100	99	99	97	98	101	103	103	101
00:04:24	101	99	98	97	96	95	95	94	94	95	96	96
00:04:36	98	97	97	98	98	100	97	95	93	92	92	93
00:04:48	95	98	98	99	99	99	97	94	91	91	92	94
00:05:00	98	100	100	98	96	96	96	96	98	99	100	100
00:05:12	101	102	102	103	106	108	108	108	108	106	106	105
00:05:24	103	103	103	102	103	103	103	103	103	102	103	103
00:05:36	103	103	103	104	104	104	105	105	105	105	104	104
00:05:48	104	104	104	105	105	105	105	106	106	106	106	106
TEST 2
Tid	+0:00	+0:01	+0:02	+0:03	+0:04	+0:05	+0:06	+0:07	+0:08	+0:09	+0:10	+0:11
00:00:00	84	84	84	84	81	85	89	91	91	91	91	100
00:00:12	99	98	99	99	100	101	102	103	104	105	106	106
00:00:24	106	107	107	107	106	106	105	106	106	106	106	106
00:00:36	107	107	108	109	109	110	111	112	113	115	116	116
00:00:48	114	112	110	110	109	109	109	110	110	111	111	111
00:01:00	112	112	113	113	113	113	113	113	112	112	112	112
00:01:12	112	112	112	113	113	113	114	114	113	113	113	113
00:01:24	113	113	113	113	113	114	114	114	115	115	116	117
00:01:36	117	117	117	118	118	117	117	117	117	116	116	115
00:01:48	115	116	116	117	117	117	118	118	118	113	110	107
00:02:00	107	110	114	116	117	117	116	115	115	115	115	115
00:02:12	115	115	115	115	115	114	114	114	114	114	115	115
00:02:24	115	115	115	115	116	117	118	118	118	118	118	118
00:02:36	118	117	116	116	116	117	119	119	119	118	118	118
00:02:48	119	120	120	119	118	117	117	116	116	116	117	118
00:03:00	120	122	122	121	120	119	118	117	115	114	113	112
00:03:12	112	112	112	113	114	114	114	113	113	113	113	112
00:03:24	113	113	114	114	115	115	113	112	111	111	111	112
00:03:36	113	111	110	111	113	115	115	116	114	113	112	111
00:03:48	111	112	111	112	114	115	116	116	117	118	118	118
00:04:00	118	117	117	117	118	118	118	118	118	118	115	114
00:04:12	115	116	116	117	117	117	116	114	114	115	115	115
00:04:24	115	116	115	114	114	113	114	115	116	117	117	117
00:04:36	115	115	114	114	115	115	114	115	116	116	116	116
00:04:48	119	119	120	120	120	116	115	113	112	113	113	112
00:05:00	111	111	111	111	113	114	115	115	114	114	113	113
00:05:12	112	113	114	115	116	116	116	115	114	113	112	112
00:05:24	112	113	113	114	115	115	115	114	114	114	114	114
00:05:36	114	115	115	115	115	115	115	115	115	115	115	114
00:05:48	114	114	114	114	115	115	116	116	116	115	116	117
TEST 3
Tid	+0:00	+0:01	+0:02	+0:03	+0:04	+0:05	+0:06	+0:07	+0:08	+0:09	+0:10	+0:11
00:00:00	94	94	94	94	99	103	105	105	105	105	105	107
00:00:12	107	107	107	107	113	113	113	113	112	112	112	112
00:00:24	112	113	114	114	114	113	113	113	114	115	115	115
00:00:36	115	115	115	116	118	119	120	120	120	120	119	120
00:00:48	118	116	114	114	114	114	115	116	117	117	117	117
00:01:00	118	117	117	118	117	117	118	118	118	117	116	116
00:01:12	116	117	118	119	120	121	122	124	124	125	124	124
00:01:24	124	124	122	121	120	120	120	120	120	120	120	121
00:01:36	121	121	121	121	120	118	117	117	118	119	119	120
00:01:48	121	121	121	121	122	123	122	123	123	122	122	123
00:02:00	122	121	120	121	121	121	121	122	122	123	122	122
00:02:12	122	122	121	119	117	116	115	116	117	118	119	120
00:02:24	121	124	125	125	124	121	118	116	115	115	116	116
00:02:36	117	118	119	120	120	121	120	121	121	121	121	122
00:02:48	122	123	124	124	123	122	121	121	121	122	122	123
00:03:00	124	124	124	123	123	124	124	124	124	124	126	124
00:03:12	124	124	125	126	127	127	126	125	125	125	125	126
00:03:24	127	127	127	128	128	129	130	130	130	131	131	132
00:03:36	132	132	132	132	131	131	131	131	131	132	133	134
00:03:48	134	134	134	134	134	133	134	134	134	134	133	133
00:04:00	132	131	131	132	132	133	133	133	134	135	135	135
00:04:12	133	132	131	130	129	129	129	129	130	130	130	130
00:04:24	130	130	130	129	129	129	130	131	132	133	134	134
00:04:36	134	133	133	133	129	129	129	130	130	131	132	132
00:04:48	132	131	132	132	132	132	132	132	132	133	134	133
00:05:00	133	133	134	134	134	134	133	134	134	134	134	134
00:05:12	134	134	134	133	133	133	133	132	130	130	130	129
00:05:24	130	132	132	131	131	130	130	130	130	130	130	130
00:05:36	130	131	132	132	134	135	136	135	135	134	134	134
00:05:48	134	134	130	130	130	129	130	130	131	131	131	131

## Sheet: P8
TESt 1
Time	+0:00	+0:01	+0:02	+0:03	+0:04	+0:05	+0:06	+0:07	+0:08	+0:09	+0:10	+0:11
00:00:00	112	112	112	112	112	113	114	116	118	120	121	123
00:00:12	125	126	130	131	131	132	132	134	134	133	133	132
00:00:24	130	130	130	131	131	129	129	130	132	132	131	131
00:00:36	131	130	130	129	130	129	133	132	132	132	132	132
00:00:48	132	132	133	131	133	133	134	134	134	132	133	133
00:01:00	131	133	133	132	131	132	131	130	131	133	132	132
00:01:12	134	133	134	134	134	133	131	133	131	131	131	131
00:01:24	131	129	129	128	129	128	128	128	128	129	132	131
00:01:36	132	131	131	133	131	131	133	133	132	133	132	134
00:01:48	134	134	133	135	133	133	132	133	134	134	134	134
00:02:00	133	134	133	134	135	134	134	135	133	134	135	135
00:02:12	135	137	137	137	139	140	139	139	140	138	138	140
00:02:24	138	140	140	139	139	139	137	137	137	137	138	139
00:02:36	137	138	139	139	139	138	138	138	138	140	141	141
00:02:48	140	141	140	140	140	140	139	141	141	140	142	142
00:03:00	142	141	142	142	142	143	141	143	143	143	143	144
00:03:12	144	143	144	143	143	143	143	143	142	143	143	142
00:03:24	144	144	142	144	142	143	145	146	146	145	145	145
00:03:36	145	145	145	145	145	145	145	146	146	146	146	147
00:03:48	147	146	146	145	144	144	143	143	142	141	141	141
00:04:00	143	143	145	145	145	145	145	145	144	143	143	143
00:04:12	143	143	143	143	142	143	144	143	143	144	143	145
00:04:24	145	146	146	146	146	146	145	145	145	145	145	145
00:04:36	146	147	147	147	147	147	147	146	146	146	146	145
00:04:48	146	146	146	147	144	145	146	146	147	147	146	149
00:05:00	149	149	150	149	149	149	149	148	148	148	148	149
00:05:12	149	150	149	149	150	150	150	149	150	150	150	149
00:05:24	150	150	150	150	150	149	149	149	149	149	149	148
00:05:36	149	148	149	148	149	149	149	149	150	150	150	150
00:05:48	150	149	148	148	148	148	146	147	147	148	146	148
Test 2
Time	+0:00	+0:01	+0:02	+0:03	+0:04	+0:05	+0:06	+0:07	+0:08	+0:09	+0:10	+0:11
00:00:00	102	102	102	102	97	98	99	108	109	110	110	109
00:00:12	110	109	110	110	110	112	114	116	118	120	124	127
00:00:24	129	130	131	132	132	132	132	132	131	130	130	130
00:00:36	131	131	131	131	131	131	130	131	131	132	133	133
00:00:48	133	133	134	135	135	136	136	136	138	138	139	139
00:01:00	140	141	141	141	141	141	141	141	141	141	141	141
00:01:12	141	141	141	141	140	140	140	141	140	140	141	141
00:01:24	141	142	142	143	143	143	144	144	144	145	145	145
00:01:36	146	146	146	146	146	146	146	146	147	147	147	146
00:01:48	146	146	146	147	147	147	147	147	147	147	147	148
00:02:00	147	148	148	148	149	149	149	149	149	149	148	147
00:02:12	147	147	147	147	146	146	147	147	147	148	148	148
00:02:24	148	149	149	149	150	150	150	151	151	151	151	151
00:02:36	150	150	151	151	152	151	151	151	151	151	151	151
00:02:48	151	151	151	152	152	153	153	153	153	153	153	153
00:03:00	153	153	153	154	154	154	154	155	155	155	155	156
00:03:12	155	155	155	156	156	156	156	156	157	157	157	157
00:03:24	158	158	158	158	158	159	159	159	159	159	159	159
00:03:36	159	159	158	158	158	158	158	158	158	159	159	159
00:03:48	160	160	160	160	160	160	160	160	160	160	159	159
00:04:00	159	159	159	159	159	159	159	159	159	159	159	159
00:04:12	159	159	159	159	160	160	161	161	161	161	161	160
00:04:24	160	160	161	160	160	160	160	160	160	160	161	160
00:04:36	161	161	161	161	160	161	162	161	162	162	162	162
00:04:48	161	162	161	162	161	161	162	162	161	161	163	162
00:05:00	162	162	162	162	162	162	161	162	162	163	162	163
00:05:12	162	163	163	163	162	162	163	162	161	162	162	162
00:05:24	162	162	162	163	163	163	164	163	163	163	164	164
00:05:36	164	164	163	163	163	163	163	163	163	163	164	163
00:05:48	164	164	166	165	165	165	165	166	166	166	166	167
Test 3
Time	+0:00	+0:01	+0:02	+0:03	+0:04	+0:05	+0:06	+0:07	+0:08	+0:09	+0:10	+0:11
00:00:00	113	113	113	113	112	115	116	117	115	117	118	118
00:00:12	118	119	121	123	124	126	128	130	131	131	132	133
00:00:24	134	135	136	137	138	138	139	139	140	141	142	142
00:00:36	142	142	142	142	142	142	142	142	143	143	144	144
00:00:48	145	145	145	145	146	146	147	147	147	147	148	148
00:01:00	148	148	148	148	149	148	148	148	147	147	147	147
00:01:12	148	148	148	148	148	148	148	148	149	149	149	150
00:01:24	150	150	151	151	151	151	151	152	152	152	152	152
00:01:36	151	151	151	151	151	151	152	152	153	153	154	155
00:01:48	155	156	156	156	156	156	156	156	156	156	156	155
00:02:00	155	155	155	155	155	155	155	155	155	156	156	157
00:02:12	157	157	157	157	157	157	157	157	157	158	158	158
00:02:24	158	158	158	158	159	159	160	159	160	160	160	161
00:02:36	161	161	161	161	161	162	162	162	162	162	162	162
00:02:48	162	162	162	161	161	161	160	161	160	160	159	159
00:03:00	160	160	160	160	161	161	161	161	161	161	161	162
00:03:12	161	161	162	162	162	163	163	163	164	164	165	164
00:03:24	164	165	164	164	165	165	165	166	167	167	166	166
00:03:36	166	166	165	166	166	166	166	166	167	166	166	165
00:03:48	165	167	166	166	166	166	165	166	166	166	165	166
00:04:00	167	166	167	167	166	166	166	166	167	166	167	167
00:04:12	166	165	165	165	165	164	165	165	165	166	166	166
00:04:24	167	166	165	166	166	166	167	167	167	167	169	167
00:04:36	167	168	168	168	168	168	168	168	168	167	168	168
00:04:48	168	168	168	168	168	168	168	167	168	168	168	168
00:05:00	169	169	168	168	168	168	167	166	166	166	166	165
00:05:12	166	166	166	166	166	167	166	166	166	166	166	166
00:05:24	167	167	165	166	166	166	165	166	166	167	166	166
00:05:36	166	167	166	166	167	167	167	167	167	167	166	167
00:05:48	167	167	167	168	168	168	167	168	167	168	168	167

## Sheet: P9
Test 1
Time	+0:00	+0:01	+0:02	+0:03	+0:04	+0:05	+0:06	+0:07	+0:08	+0:09	+0:10	+0:11
00:00:00	101	101	101	99	98	98	98	97	98	95	97	100
00:00:12	105	109	111	113	115	117	117	118	119	119	121	121
00:00:24	121	123	122	123	124	124	125	125	126	126	126	127
00:00:36	127	127	127	127	141	141	141	131	129	129	126	125
00:00:48	124	124	124	124	125	125	126	126	126	127	126	126
00:01:00	126	126	127	127	128	128	128	128	128	128	129	128
00:01:12	128	129	128	128	128	128	130	129	129	130	129	129
00:01:24	129	130	130	130	130	130	130	130	130	130	130	130
00:01:36	130	129	129	129	129	129	130	129	130	131	130	130
00:01:48	130	129	130	130	131	131	131	131	131	131	132	130
00:02:00	130	129	129	129	129	129	130	130	130	130	129	130
00:02:12	129	128	129	129	130	130	130	130	131	130	130	130
00:02:24	130	133	132	131	130	130	130	130	130	130	130	129
00:02:36	129	129	129	129	129	131	131	131	129	130	130	129
00:02:48	129	130	131	131	133	133	132	133	133	132	133	132
00:03:00	132	132	131	131	130	129	130	129	130	131	130	130
00:03:12	130	131	130	130	130	131	130	130	130	131	131	129
00:03:24	128	128	128	129	129	129	131	130	130	130	130	130
00:03:36	130	130	131	132	132	133	133	132	133	132	131	131
00:03:48	130	130	130	129	129	132	132	133	132	132	132	131
00:04:00	131	131	131	128	131	131	132	132	133	132	132	133
00:04:12	132	132	133	132	133	132	131	130	129	130	129	130
00:04:24	129	130	129	128	128	127	128	128	129	129	130	129
00:04:36	130	129	128	129	129	130	130	129	129	129	128	129
00:04:48	129	130	130	131	132	131	131	132	131	131	132	131
00:05:00	131	132	131	131	131	131	131	131	131	130	130	129
00:05:12	130	130	130	131	130	130	131	130	130	131	130	129
00:05:24	129	129	129	128	129	128	128	129	129	128	129	127
00:05:36	128	127	127	128	129	129	129	130	130	130	129	130
00:05:48	129	128	129	130	129	129	130	129	130	129	129	129
Test 2
Time	+0:00	+0:01	+0:02	+0:03	+0:04	+0:05	+0:06	+0:07	+0:08	+0:09	+0:10	+0:11
00:00:00	126	126	127	129	130	132	133	133	133	134	133	133
00:00:12	133	133	133	133	133	133	134	135	135	136	136	136
00:00:24	136	136	137	137	137	138	138	139	139	139	140	139
00:00:36	139	140	139	140	140	140	139	139	139	139	140	139
00:00:48	140	140	140	140	141	141	141	141	141	142	141	142
00:01:00	142	141	142	141	142	141	141	141	141	141	141	141
00:01:12	141	141	141	142	141	141	141	140	141	140	141	141
00:01:24	141	141	141	141	141	141	141	141	141	141	141	140
00:01:36	140	140	139	140	140	140	141	141	142	141	141	141
00:01:48	141	141	142	142	142	142	141	142	141	142	141	141
00:02:00	141	141	141	141	142	142	143	143	143	144	143	143
00:02:12	143	143	143	143	143	143	143	143	142	143	143	143
00:02:24	143	143	142	142	142	142	143	143	143	144	144	144
00:02:36	145	145	145	146	145	145	145	144	144	144	144	144
00:02:48	144	144	144	144	144	144	144	145	146	146	145	145
00:03:00	145	145	145	145	145	145	144	144	144	144	144	144
00:03:12	144	144	144	144	143	143	143	144	143	143	144	144
00:03:24	143	143	143	143	143	143	143	142	142	142	142	142
00:03:36	142	143	142	143	142	143	143	143	144	144	144	144
00:03:48	145	145	145	145	145	145	145	145	145	145	145	145
00:04:00	145	145	145	145	148	146	145	145	145	144	144	144
00:04:12	143	144	145	144	145	144	145	144	145	145	145	145
00:04:24	145	145	145	145	144	144	144	144	145	145	145	145
00:04:36	145	146	145	145	146	146	145	145	145	144	144	144
00:04:48	144	144	144	144	143	143	143	142	143	143	143	140
00:05:00	143	145	146	147	147	147	147	147	147	146	146	146
00:05:12	146	146	146	145	145	146	145	145	145	146	146	146
00:05:24	146	145	146	145	145	145	144	144	144	144	144	143
00:05:36	143	143	144	143	144	144	143	143	143	143	144	144
00:05:48	144	145	144	144	143	143	143	143	143	143	143	143
Test 3
Time	+0:00	+0:01	+0:02	+0:03	+0:04	+0:05	+0:06	+0:07	+0:08	+0:09	+0:10	+0:11
00:00:00	107	107	107	107	120	121	120	119	119	119	118	119
00:00:12	117	118	119	119	119	120	120	121	121	121	122	121
00:00:24	122	122	123	124	124	125	125	125	125	125	126	125
00:00:36	125	125	125	124	125	126	126	127	127	126	126	125
00:00:48	125	126	127	125	125	126	126	126	126	127	126	127
00:01:00	126	127	126	127	127	128	128	129	129	128	128	129
00:01:12	129	129	130	130	131	130	131	131	132	132	132	132
00:01:24	132	132	132	132	132	133	132	131	132	131	130	131
00:01:36	132	132	132	132	133	132	133	133	133	133	133	133
00:01:48	134	132	133	132	132	133	132	132	132	131	132	132
00:02:00	132	132	132	134	133	133	134	134	134	133	133	133
00:02:12	133	133	133	132	132	132	132	131	130	129	130	131
00:02:24	131	132	132	133	137	132	133	133	133	133	138	137
00:02:36	136	135	135	134	134	134	134	132	133	133	133	134
00:02:48	134	134	135	134	134	135	135	135	135	136	136	136
00:03:00	136	135	135	136	136	136	136	133	130	131	131	131
00:03:12	131	131	132	132	133	133	133	133	131	133	133	134
00:03:24	134	134	134	134	134	134	133	134	134	135	134	135
00:03:36	136	135	136	136	136	136	135	135	135	136	136	136
00:03:48	137	137	137	137	136	136	135	136	136	136	137	136
00:04:00	136	136	136	137	136	136	136	135	136	135	135	135
00:04:12	135	134	134	135	134	134	134	134	135	135	136	136
00:04:24	136	137	136	136	136	136	136	136	136	136	135	135
00:04:36	135	134	135	134	133	134	133	134	135	134	134	134
00:04:48	134	133	134	134	133	133	134	133	134	134	134	135
00:05:00	135	136	136	134	134	134	135	135	136	136	135	135
00:05:12	135	134	134	135	135	135	136	136	136	136	136	136
00:05:24	136	136	135	135	134	134	135	135	135	136	136	135
00:05:36	135	136	134	136	135	136	136	134	134	134	134	134
00:05:48	134	135	134	135	135	134	136	135	136	136	136	137

## Sheet: P10
test 1
Tid	+0:00	+0:01	+0:02	+0:03	+0:04	+0:05	+0:06	+0:07	+0:08	+0:09	+0:10	+0:11
00:00:00	69	69	69	68	70	71	73	78	80	84	85	88
00:00:12	89	91	93	94	94	94	94	94	93	92	93	94
00:00:24	94	95	96	97	98	98	100	100	102	103	104	104
00:00:36	105	105	105	105	105	105	105	106	107	106	107	106
00:00:48	106	106	106	106	106	107	106	107	107	107	107	107
00:01:00	108	108	109	109	109	109	109	109	110	111	111	111
00:01:12	112	112	113	113	114	114	114	115	114	115	114	114
00:01:24	114	119	115	115	115	116	116	116	116	116	116	115
00:01:36	116	116	116	116	116	116	116	117	117	117	118	118
00:01:48	118	119	119	119	118	118	117	117	117	117	117	118
00:02:00	118	118	118	119	118	119	118	118	118	118	118	118
00:02:12	118	118	117	118	118	118	118	117	116	116	115	115
00:02:24	115	115	115	116	117	117	118	118	119	119	119	119
00:02:36	119	119	119	119	119	118	118	118	119	119	118	118
00:02:48	118	118	118	118	118	118	118	118	118	117	117	117
00:03:00	117	117	117	117	117	118	118	119	119	118	117	117
00:03:12	117	117	117	117	118	118	118	117	117	117	118	118
00:03:24	119	119	118	118	116	116	115	114	114	114	115	116
00:03:36	116	117	117	116	116	115	115	116	116	116	115	115
00:03:48	116	116	116	117	116	117	117	117	117	118	118	119
00:04:00	119	119	119	119	119	119	119	120	120	120	119	120
00:04:12	119	119	118	118	118	118	118	116	116	116	115	116
00:04:24	116	117	117	118	118	118	119	119	119	120	120	120
00:04:36	120	120	120	120	120	121	120	121	121	121	121	121
00:04:48	121	121	121	121	122	121	122	122	122	123	123	123
00:05:00	123	123	123	123	122	122	122	122	122	121	120	120
00:05:12	119	119	119	120	120	120	120	120	120	120	119	118
00:05:24	118	118	119	119	120	121	121	121	120	120	120	120
00:05:36	119	119	119	119	119	119	118	118	118	118	118	119
00:05:48	119	120	119	120	119	119	118	119	118	119	119	119
Test 2
Tid	+0:00	+0:01	+0:02	+0:03	+0:04	+0:05	+0:06	+0:07	+0:08	+0:09	+0:10	+0:11
00:00:00	72	72	72	72	77	78	76	80	80	80	80	80
00:00:12	80	80	80	80	80	80	80	80	80	80	80	80
00:00:24	80	80	80	80	80	80	80	80	80	80	80	80
00:00:36	80	80	111	111	111	111	111	111	111	111	113	112
00:00:48	112	112	112	112	112	112	112	112	115	115	115	115
00:01:00	113	115	117	117	118	118	118	118	118	115	115	115
00:01:12	120	120	120	120	123	122	122	122	122	122	122	122
00:01:24	122	122	122	122	122	122	122	122	122	122	122	122
00:01:36	122	122	122	122	122	122	122	122	122	122	122	122
00:01:48	122	122	122	125	126	126	126	126	126	126	126	129
00:02:00	129	129	129	129	129	126	127	127	127	127	127	127
00:02:12	138	138	138	138	129	128	128	128	128	128	128	128
00:02:24	128	131	134	130	130	130	130	129	134	134	134	134
00:02:36	129	129	128	128	129	129	130	130	130	130	133	132
00:02:48	130	130	129	129	129	129	127	127	127	127	128	129
00:03:00	128	129	128	127	127	127	128	128	128	129	128	129
00:03:12	129	127	127	127	132	132	132	134	133	133	132	131
00:03:24	132	132	132	135	134	135	135	135	135	134	134	134
00:03:36	133	133	132	132	132	132	132	133	133	133	134	133
00:03:48	133	133	133	132	132	131	131	131	131	131	132	132
00:04:00	132	133	133	133	133	133	133	133	133	133	132	132
00:04:12	132	132	134	133	133	133	133	133	133	133	133	133
00:04:24	133	133	133	133	133	133	133	133	131	132	133	133
00:04:36	130	131	132	132	132	132	132	146	141	138	137	137
00:04:48	137	128	129	129	130	130	130	130	131	131	132	132
00:05:00	132	134	133	134	134	134	134	134	134	133	133	134
00:05:12	134	134	134	134	133	134	133	133	133	132	132	132
00:05:24	132	133	133	133	132	133	133	133	134	134	134	134
00:05:36	134	135	133	133	133	133	133	133	133	134	134	133
00:05:48	134	133	133	133	133	133	133	133	133	133	134	134
Test 3
Tid	+0:00	+0:01	+0:02	+0:03	+0:04	+0:05	+0:06	+0:07	+0:08	+0:09	+0:10	+0:11
00:00:00	56	56	56	56	56	59	60	61	63	66	67	68
00:00:12	70	72	73	73	73	74	74	74	74	74	74	75
00:00:24	76	77	77	77	77	85	86	89	90	92	92	92
00:00:36	92	92	92	92	92	92	92	92	99	99	99	99
00:00:48	99	99	99	99	99	99	99	99	99	103	100	101
00:01:00	101	101	100	103	103	103	103	103	103	103	105	104
00:01:12	104	104	105	102	102	102	102	104	104	104	104	103
00:01:24	103	103	103	104	104	105	106	106	106	106	106	106
00:01:36	106	106	106	106	106	106	106	106	106	102	106	106
00:01:48	106	106	106	102	102	102	102	102	102	102	102	102
00:02:00	102	102	108	108	107	107	107	107	107	107	107	107
00:02:12	107	107	106	106	106	105	105	104	104	104	104	104
00:02:24	101	102	102	102	103	102	103	103	103	103	103	101
00:02:36	102	102	102	102	102	102	102	102	101	101	101	102
00:02:48	102	103	103	103	103	103	103	103	103	103	103	103
00:03:00	103	103	101	101	101	101	97	97	97	97	97	97
00:03:12	97	97	103	103	103	103	103	103	103	103	103	105
00:03:24	106	106	107	107	107	107	106	105	105	105	105	105
00:03:36	104	104	104	104	104	104	106	106	105	105	105	105
00:03:48	101	103	104	105	106	106	107	107	107	107	107	107
00:04:00	107	106	106	106	106	106	106	106	106	106	106	106
00:04:12	105	105	104	104	104	104	104	103	103	104	104	104
00:04:24	104	105	106	106	106	106	106	105	105	105	105	105
00:04:36	104	104	104	104	104	104	104	104	104	104	104	104
00:04:48	104	104	104	103	103	103	104	104	105	104	105	105
00:05:00	105	105	105	105	106	106	106	106	106	106	106	106
00:05:12	106	106	106	105	105	106	105	106	105	105	105	105
00:05:24	105	113	113	113	113	106	107	107	107	106	106	105
00:05:36	105	105	105	102	103	103	103	103	103	106	107	107
00:05:48	107	106	105	105	104	103	103	103	103	103	103	105

[truncated: 6 more sheets: P11, P12, P13, P14, P15, P16]
